# Supplementary material for: Modularity, criticality, and evolvability of a developmental gene regulatory network
Source: eLife journal article supplement (doi:10.7554/elife.42832), 2019-06-06
Supplement: supp [file elife-42832-supp-v1.zip]

Archive with 3 entries (3 files):
- elife_poa_e42832_Transparent_Reporting_File.pdf
- elife_poa_e42832_Figure_3_figure_supplement_1.png
- elife_poa_e42832_Figure_3_figure_supplement_2.png
