# Supplementary figures and images for: Modularity, criticality, and evolvability of a developmental gene regulatory network
Source: eLife journal article supplement (doi:10.7554/elife.42832), 2019-06-06

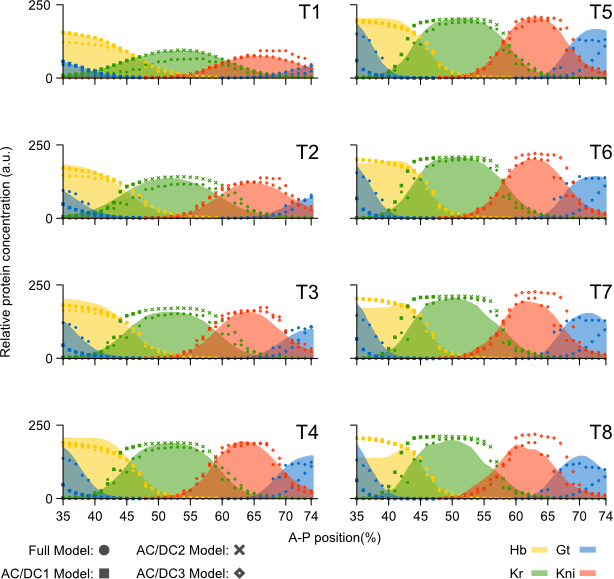

Supplement: supp [file elife-42832-supp-v1.zip › elife_poa_e42832_Figure_3_figure_supplement_1.png]

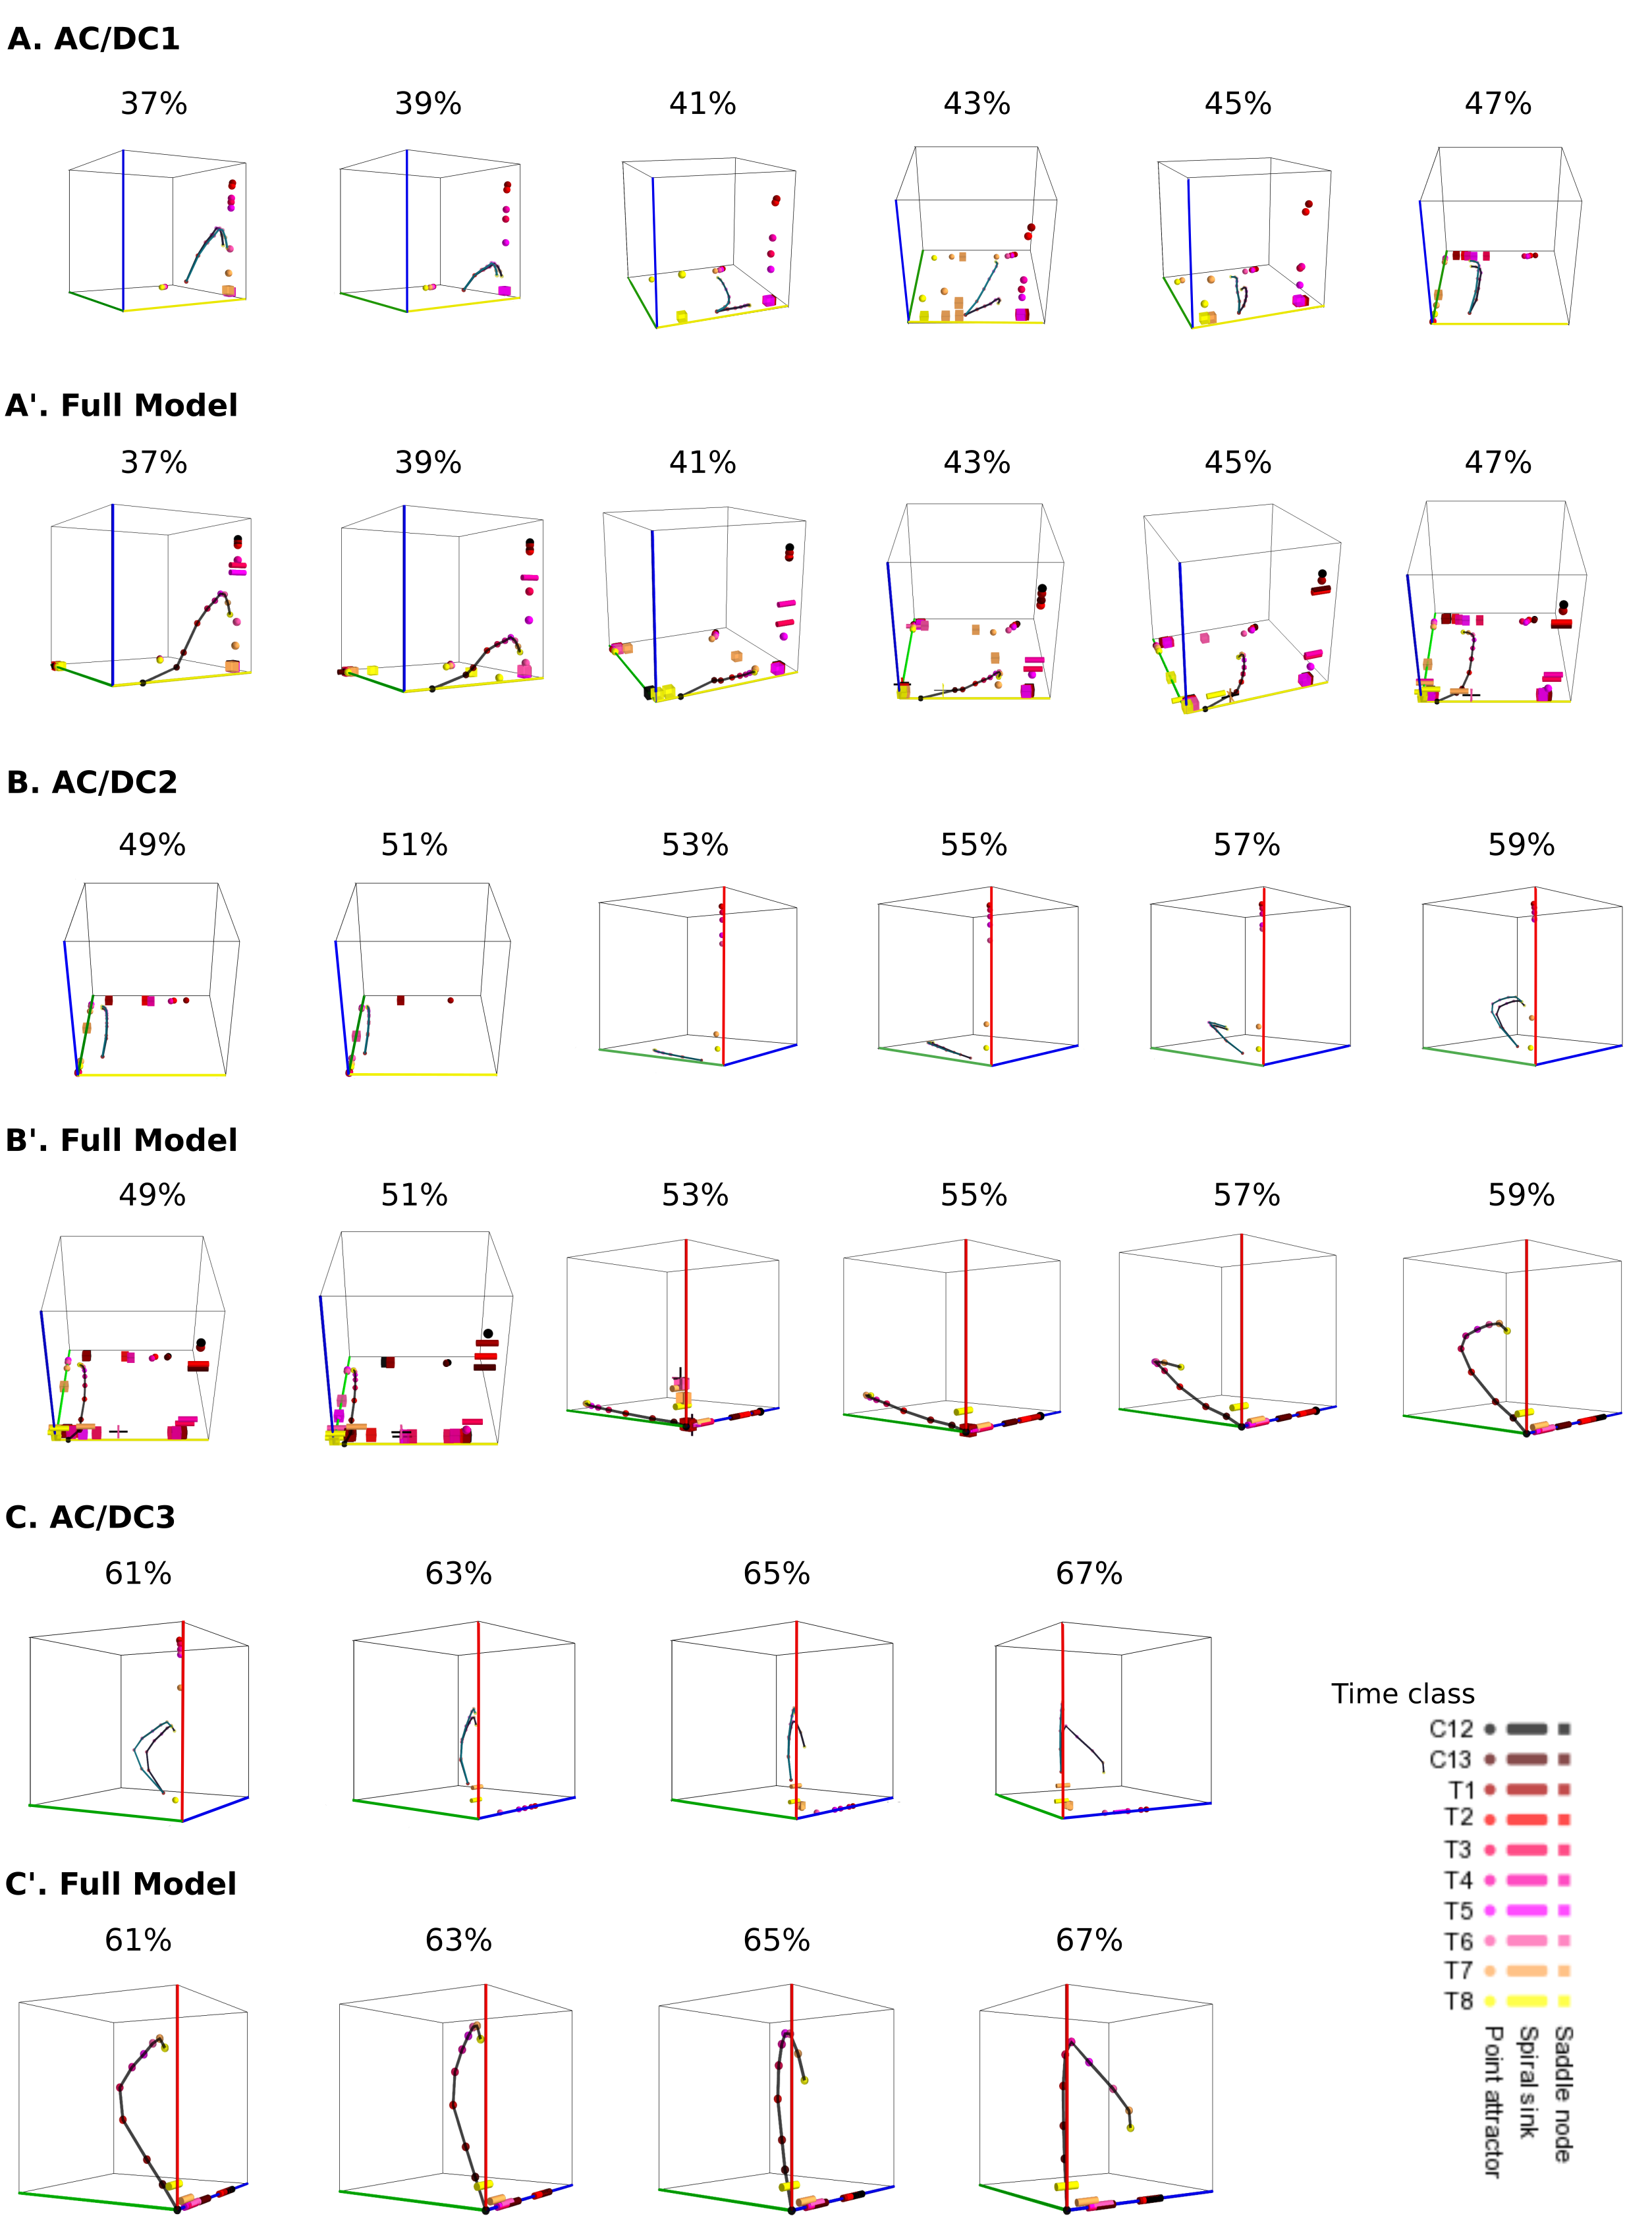

Supplement: supp [file elife-42832-supp-v1.zip › elife_poa_e42832_Figure_3_figure_supplement_2.png]
